# Supplementary material for: Effects of esketamine on patient-reported outcomes in major depressive disorder with active suicidal ideation and intent: a pooled analysis of two randomized phase 3 trials (ASPIRE I and ASPIRE II)
Source: Springer Nature journal article supplement (doi:10.1007/s11136-023-03451-9), 2023-07-13
Supplement: MOESM1 [file 25769386]

**Supplementary Fig. 1** Frequency distribution of patients reporting problems on each dimension of the EQ-5D-5L at baseline and day 25 (pooled data)

(pooled data)

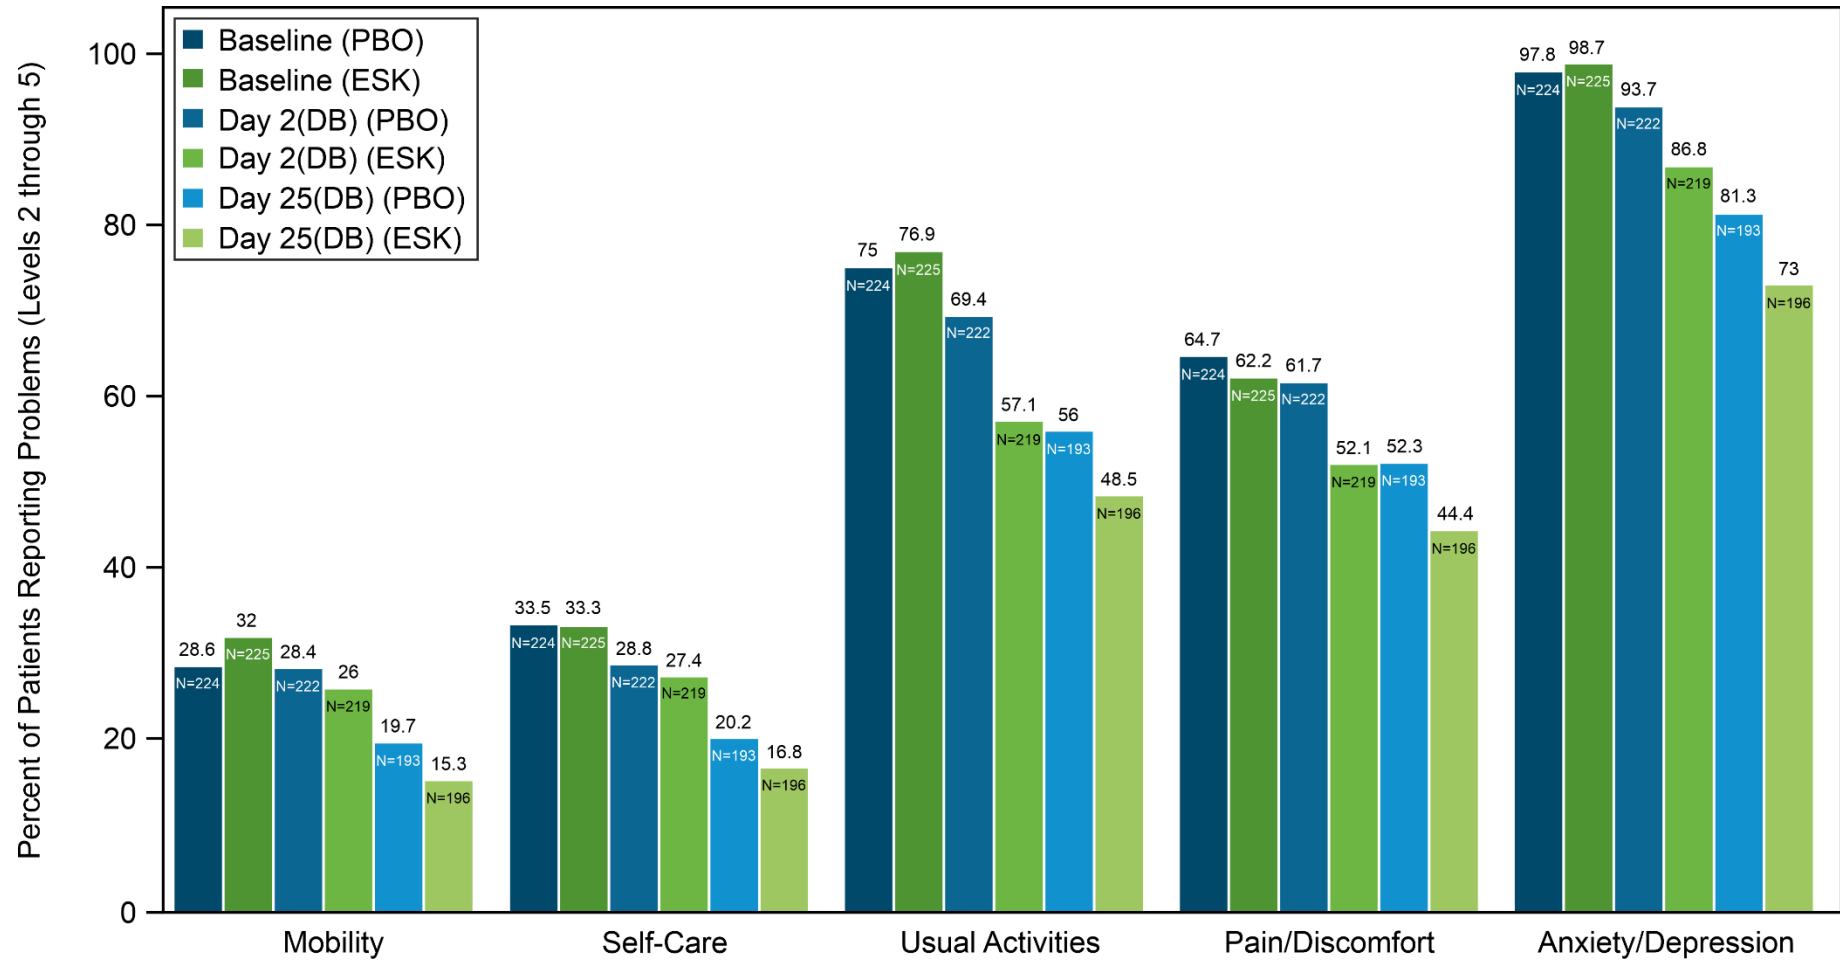

EQ-5D-5L, European Quality of Life Group, 5-Dimension, 5-Level; ESK, esketamine; PBO, placebo
